# Supplementary material
Source: Springer Nature journal article supplement (https://www.springermedizin.de/resource/supplementary/12874_2010_511_MOESM3_ESM.pdf/9432030)
Supplement: MOESM3 [file 9432030]

| Project                        | Participant Information                                                                                                                                                                              | RECRUITMENT METHODS                                                                                                      |                                                                                                      |                                                                                                                             |                                                                                                                                                                                                | Recruitment Rate                                                                                                           | Representative Advisory Groups                                                              | Incentives                                                                                                                                            | Time Required to Recruit                       | Flexible Strategies                                                                                |
|--------------------------------|------------------------------------------------------------------------------------------------------------------------------------------------------------------------------------------------------|--------------------------------------------------------------------------------------------------------------------------|------------------------------------------------------------------------------------------------------|-----------------------------------------------------------------------------------------------------------------------------|------------------------------------------------------------------------------------------------------------------------------------------------------------------------------------------------|----------------------------------------------------------------------------------------------------------------------------|---------------------------------------------------------------------------------------------|-------------------------------------------------------------------------------------------------------------------------------------------------------|------------------------------------------------|----------------------------------------------------------------------------------------------------|
|                                |                                                                                                                                                                                                      | Dillman / Modified Dillman                                                                                               | Use of Local Opinion Leader                                                                          | Face to Face Recruiters                                                                                                     | Responsible for Recruitment                                                                                                                                                                    |                                                                                                                            |                                                                                             |                                                                                                                                                       |                                                |                                                                                                    |
| <b>COMP-PC</b><br>(2004-2006)  | Practices:<br>137 recruited<br>All CHC, HSO, & FHN in Ontario +197 randomly selected FFS-FHG<br>Providers:<br>363 (surveyed)<br>46 (interviewed)<br>Patients:<br>5361 (surveyed)<br>24 (interviewed) | Dillman / Modified Dillman<br><br>Modified Dillman (invitation material mailed and combination of methods for follow-up) | Use of Local Opinion Leader<br><br>Yes - limited to end of study - regional leaders made phone calls | Face to Face Recruiters<br><br>Yes - response rate much higher-done only at end of study                                    | Responsible for Recruitment<br><br>Practice recruitment by investigators with support from central organizations. Practices invited eligible providers. Patients recruited through front desk. | Avg Practices (45%) of 365 eligible practices. 82% of 6522 eligible patients<br>Provider participation not tracked if >50% | Yes - very useful. Had stakeholder advisory group- at least 2 members of each group studied | <i>Financial:</i><br>\$2,000 for quantitative component - \$500 for qualitative<br><i>Non Financial:</i><br>Token gifts for period of data collection | 9 months - targets not reached entirely        | Invitation letters, follow-up letters, emails & telephone calls. Finally, face to face recruitment |
| <b>IDOCC</b><br>(2007-current) | Practices:<br>Approached = 372<br>Recruited = 93<br>Physicians:<br>Approached = 1077<br>Recruited = 200                                                                                              | Modified Dillman (invitation material mailed and combination of methods for follow-up)                                   | Step 1 - yes<br>Step 2 - no                                                                          | Yes - project staff (outreach facilitators) visited providers who had not responded - challenging strains on physician time | Lead physicians were sent letters and asked if interested in IDOCC. Physician investigator made follow-up phone call if necessary.                                                             | Avg Practices (25%) of 372 eligible practices. 19% of 1077 eligible physicians.                                            | Yes- stakeholder advisory group                                                             | <i>Non Financial:</i><br>Assistance with practice improvement                                                                                         | Step 1 - almost 10 months<br>Step 2 - 4 months | No                                                                                                 |
| <b>ICFPC</b><br>(2004-2005)    | Practices:<br>Eligible = 99<br>Recruited = 30<br>Physicians:<br>Eligible = 164<br>Recruited = 58                                                                                                     | Modified Dillman (invitation material mailed and combination of methods for follow-up)                                   | Yes                                                                                                  | No                                                                                                                          | Contact made through lead physician at each site. If interested all other physicians were contacted.                                                                                           | Avg Practices (30%) of 99 eligible practices. 100% of eligible physicians (58 of 58 physicians from recruited practices).  | No                                                                                          | No                                                                                                                                                    | 9 months                                       | No                                                                                                 |
| <b>CHAP</b><br>(2001-current)  | Communities:<br>Identified = 41<br>Eligible = 39<br>Participated = 39<br>20 Communities in CHAP average 17.1 physicians.<br>19 Communities in Control average 19.1 physicians.                       | No<br><br>(Information session, physician meeting, letters & follow-up)                                                  | Yes - physician opinion leader model used                                                            | Yes - local opinion leaders used at start - called community meeting - local coordinators traveled to physician office      | Opinion leader physicians used to recruit colleagues                                                                                                                                           | Physicians (49%) of approximately 700.                                                                                     | Yes, in some areas, not everywhere                                                          | <i>Non Financial:</i><br>Feedback on individual participants sent directly to physicians                                                              | Unsure                                         | Yes                                                                                                |
| <b>FWS</b><br>(1999-2006)      | Family Physicians recruited                                                                                                                                                                          | Modified Dillman                                                                                                         | No                                                                                                   | No                                                                                                                          | No                                                                                                                                                                                             | Physicians (20.2%)                                                                                                         | No                                                                                          | No                                                                                                                                                    | Repeat mailings and reminders (5 in total)     | No                                                                                                 |
